# Supplementary material
Source: MDPI journal article supplement (https://www.mdpi.com/2313-4321/6/3/58)
Supplement: s1 [file s1]

**Table S1:** Tensile properties for the developed blends.

| <b>System</b> | <b><math>\sigma_{\text{yield}}</math> (MPa)</b> | <b><math>\epsilon_{\text{yield}}</math> (%)</b> | <b><math>\sigma_{\text{break}}</math> (Mpa)</b> | <b><math>\epsilon_{\text{break}}</math> (%)</b> | <b>E (Mpa)</b> |
|---------------|-------------------------------------------------|-------------------------------------------------|-------------------------------------------------|-------------------------------------------------|----------------|
| PC100-PI0     | 24.8 ± 1.6                                      | 8.4 ± 0.6                                       | 19.7 ± 1.5                                      | 144 ± 91                                        | 1070 ± 18      |
| PC92-PI8      | 26.8 ± 1.5                                      | 8.4 ± 0.3                                       | 25.3 ± 3.3                                      | 11 ± 5                                          | 1242 ± 52      |
| PC85-PI15     | 27.7 ± 0.4                                      | 8.8 ± 0.5                                       | 23.6 ± 2                                        | 18 ± 5                                          | 965 ± 78       |
| PC78-PI22     | 29.4 ± 1.6                                      | 8.2 ± 0.2                                       | 25.7 ± 1.7                                      | 14 ± 3                                          | 1223 ± 36      |
| PC70-PI30     | 26.1 ± 0.9                                      | 8.5 ± 0.9                                       | 22.1 ± 3.4                                      | 22 ± 12                                         | 1092 ± 31      |
| PC50-PI50     | 26.5 ± 0.7                                      | 7.6 ± 0.4                                       | 24.7 ± 2.2                                      | 12 ± 4                                          | 1056 ± 27      |
| PC0-PI100     | 31.2 ± 1.2                                      | 8.7 ± 0.7                                       | 30.7 ± 2                                        | 9 ± 1                                           | 1048 ± 28      |

**Table S2:** Impact strenght of the developed blends.

| <b>System</b> | <b>Impact Energy<br/>(KJ/mm<sup>2</sup>)</b> |
|---------------|----------------------------------------------|
| PC100-PI0     | 3.6 ± 0.2                                    |
| PC92-PI8      | 3.3 ± 0.3                                    |
| PC85-PI15     | 3.4 ± 0.3                                    |
| PC78-PI22     | 4.1 ± 0.5                                    |
| PC70-PI30     | 3.4 ± 0.4                                    |
| PC50-PI50     | 3.5 ± 0.4                                    |
| PC0-PI100     | 4.1 ± 0.5                                    |
